# Supplementary material for: Nuclear localization signal deletion mutants of lamin A and progerin reveal insights into lamin A processing and emerin targeting
Source: PubMed Central journal article supplement — Nucleus. 2014 Feb 4;5(1):66–74. doi: 10.4161/nucl.28068 (PMC4028357; doi:10.4161/nucl.28068), 2014-02-04
Supplement: nucl-5-66-s01.pdf [file nucl-5-66-s01.pdf]

## **Supplemental Material to:**

**Di Wu, Andrew R Flannery, Helen Cai, Eunae Ko,  
and Kan Cao**

**Nuclear localization signal deletion mutants of lamin A  
and progerin reveal insights into lamin A processing and  
emerin targeting**

**Nucleus 2013; 5(1)**

**<http://dx.doi.org/10.4161/nucl.28068>**

**<http://www.landesbioscience.com/journals/nucleus/article/28068/>**

# Figure S1

AGACCCCGTCCCAGCGGGCGGCCACCCGCAGCGGGGCGCAGGCCAGCTCCACTCCGCTGTCGCCCACCCGCATCAC  
LMNA 5F (→)  
CCGGCTGCAGGAGAAGGAGGACCTGCAGGAGCTCAATGATCGCTTGGCGGTCTACATCGACCGTGTGCGCTCGCTGG  
AAACGGAGAACGCAGGGCTGCGCCTTCGCATCACCGAGTCTGAAGAGGTGGTCAGCCGCGAGGTGTCCGGCATCAAG  
GCCGCCTACGAGGCCGAGCTCGGGGATGCCCGCAAGACCCTTGACTCAGTAGCCAAGGAGCGCGCCCGCCTGCAGC  
TGGAGCTGAGCAAAGTGCGTGAGGAGTTTAAGGAGCTGAAAGCGCGCAATACCAAGAAGGAGGGTGACCTGATAGCT  
GCTCAGGCTCGGCTGAAGGACCTGGAGGCTCTGCTGAACTCCAAGGAGGCCGCACTGAGCACTGCTCTCAGTGAGAA  
GCGCACGCTGGAGGGCGAGCTGCATGATCTGCGGGGCCAGGTGGCCAAGCTTGAGGCAGCCCTAGGTGAGGCCAAG  
AAGCAACTTCAGGATGAGATGCTGCGGCGGGTGGATGCTGAGAACAGGCTGCAGACCATGAAGGAGGAACTGGACTT  
CCAGAAGAACATCTACAGTGAGGAGCTGCGTGAGACCAAGCGCCGTCATGAGACCCGACTGGTGGAGATTGACAATG  
GGAAGCAGCGTGAGTTTGAGAGCCGGCTGGCGGATGCGCTGCAGGAACTGCGGGGCCAGCATGAGGACCAGGTGGA  
GCAGTATAAGAAGGAGCTGGAGAAGACTTATTCTGCCAAGCTGGACAATGCCAGGCAGTCTGCTGAGAGGAACAGCAA  
CCTGGTGGGGGCTGCCACGAGGAGCTGCAGCAGTCGCGCATCCGCATCGACAGCCTCTCTGCCAGCTCAGCCAGC  
TCCAGAAGCAGCTGGCAGCCAAGGAGGCGAAGCTTCGAGACCTGGAGGACTCACTGGCCCGTGAGCGGGACACCAG  
CCGGCGGCTGCTGGCGGAAAAGGAGCGGGAGATGGCCGAGATGCGGGCAAGGATGCAGCAGCAGCTGGACGAGTAC  
CAGGAGCTTCTGGACATCAAGCTGGCCCTGGACATGGAGATCCACGCCTACCGCAAGCTCTTGAGGGGCGAGGAGGA  
GAGGCTACGCCTGTCCCCCAGCCCTACCTCGCAGCGCAGCCGTTGGCCGTGCTTCCTCTCACTCATCCCAGACACAGG  
GTGGGGGCAGCGTCACC AAAAAGCGCAAACCTGGAG TCCACTGAGAGCCGCA GCAGCTTCTCACAGCACGCACGCAC  
LMNA 3F (→) NLS LMNA 5R (←)  
TAGCGGGCGCGTGGCCGTGGAGGAGGTGGATGAGGAGGGCAAGTTTGTCCGGCTGCGCAACAAGTCCAATGAGGAC  
CAGTCCATGGGCAATTGGCAGATCAAGCGCCAGAATGGAGATGATCCCTTGCTGACTTACCGGTTCCCACCAAAGTTCA  
CCCTGAAGGCTGGGCAGGTGGTGACGATCTGGGCTGCAGGAGCTGGGGCCACCCACAGCCCCCTACCGACCTGGT  
GTGGAAGGCACAGAACACCTGGGGCTGCGGGAACAGCCTGCGTACGGCTCTCATCAACTCCACTGGGGAAGAAGTGG  
CCATGCGCAAGCTGGTGCCTCAGTACTGTGGTTGAGGACGACGAGGATGAGGATGGAGATGACCTGCTCCATCAC  
CACCACGGCTCCCACTGCAGCAGCTCGGGGGACCCCGCTGAGTACAACCTGCGCTCGCGCACCGTGCTGTGCGGGAC  
CTGCGGGCAGCCTGCCGACAAGGCATCTGCCAGCGGCTCAGGAGCCCAGGTGGGGCGGACCCATCTCCTCTGGCTCTT  
CTGCCTCCAGTGTACGGTCACTCGCAGCTACCGCAGTGTGGGGGGCAGTGGGGGTGGCAGCTTCGGGGACAATCTG  
GTCACCCGCTCCTACCTCCTGGGCAACTCCAGCCCCGAACCCAGAGCCCCCAGA ACTGCAGCATCATGTAATCTAGA  
150 bp deletion in progerin LMNA 3R (←)  
GTCGAC

Fig S1: Sequences and positions of the primers used for generation of the NLS mutants. The 150bp deletion in progerin cDNA is highlighted in orange. Primers used for NLS deletion by PCR mutagenesis are shown in blue. The sequences underlined in blue indicate that the primer sequences are consecutive. The red box indicates the position of the NLS deletion.

## Figure S2

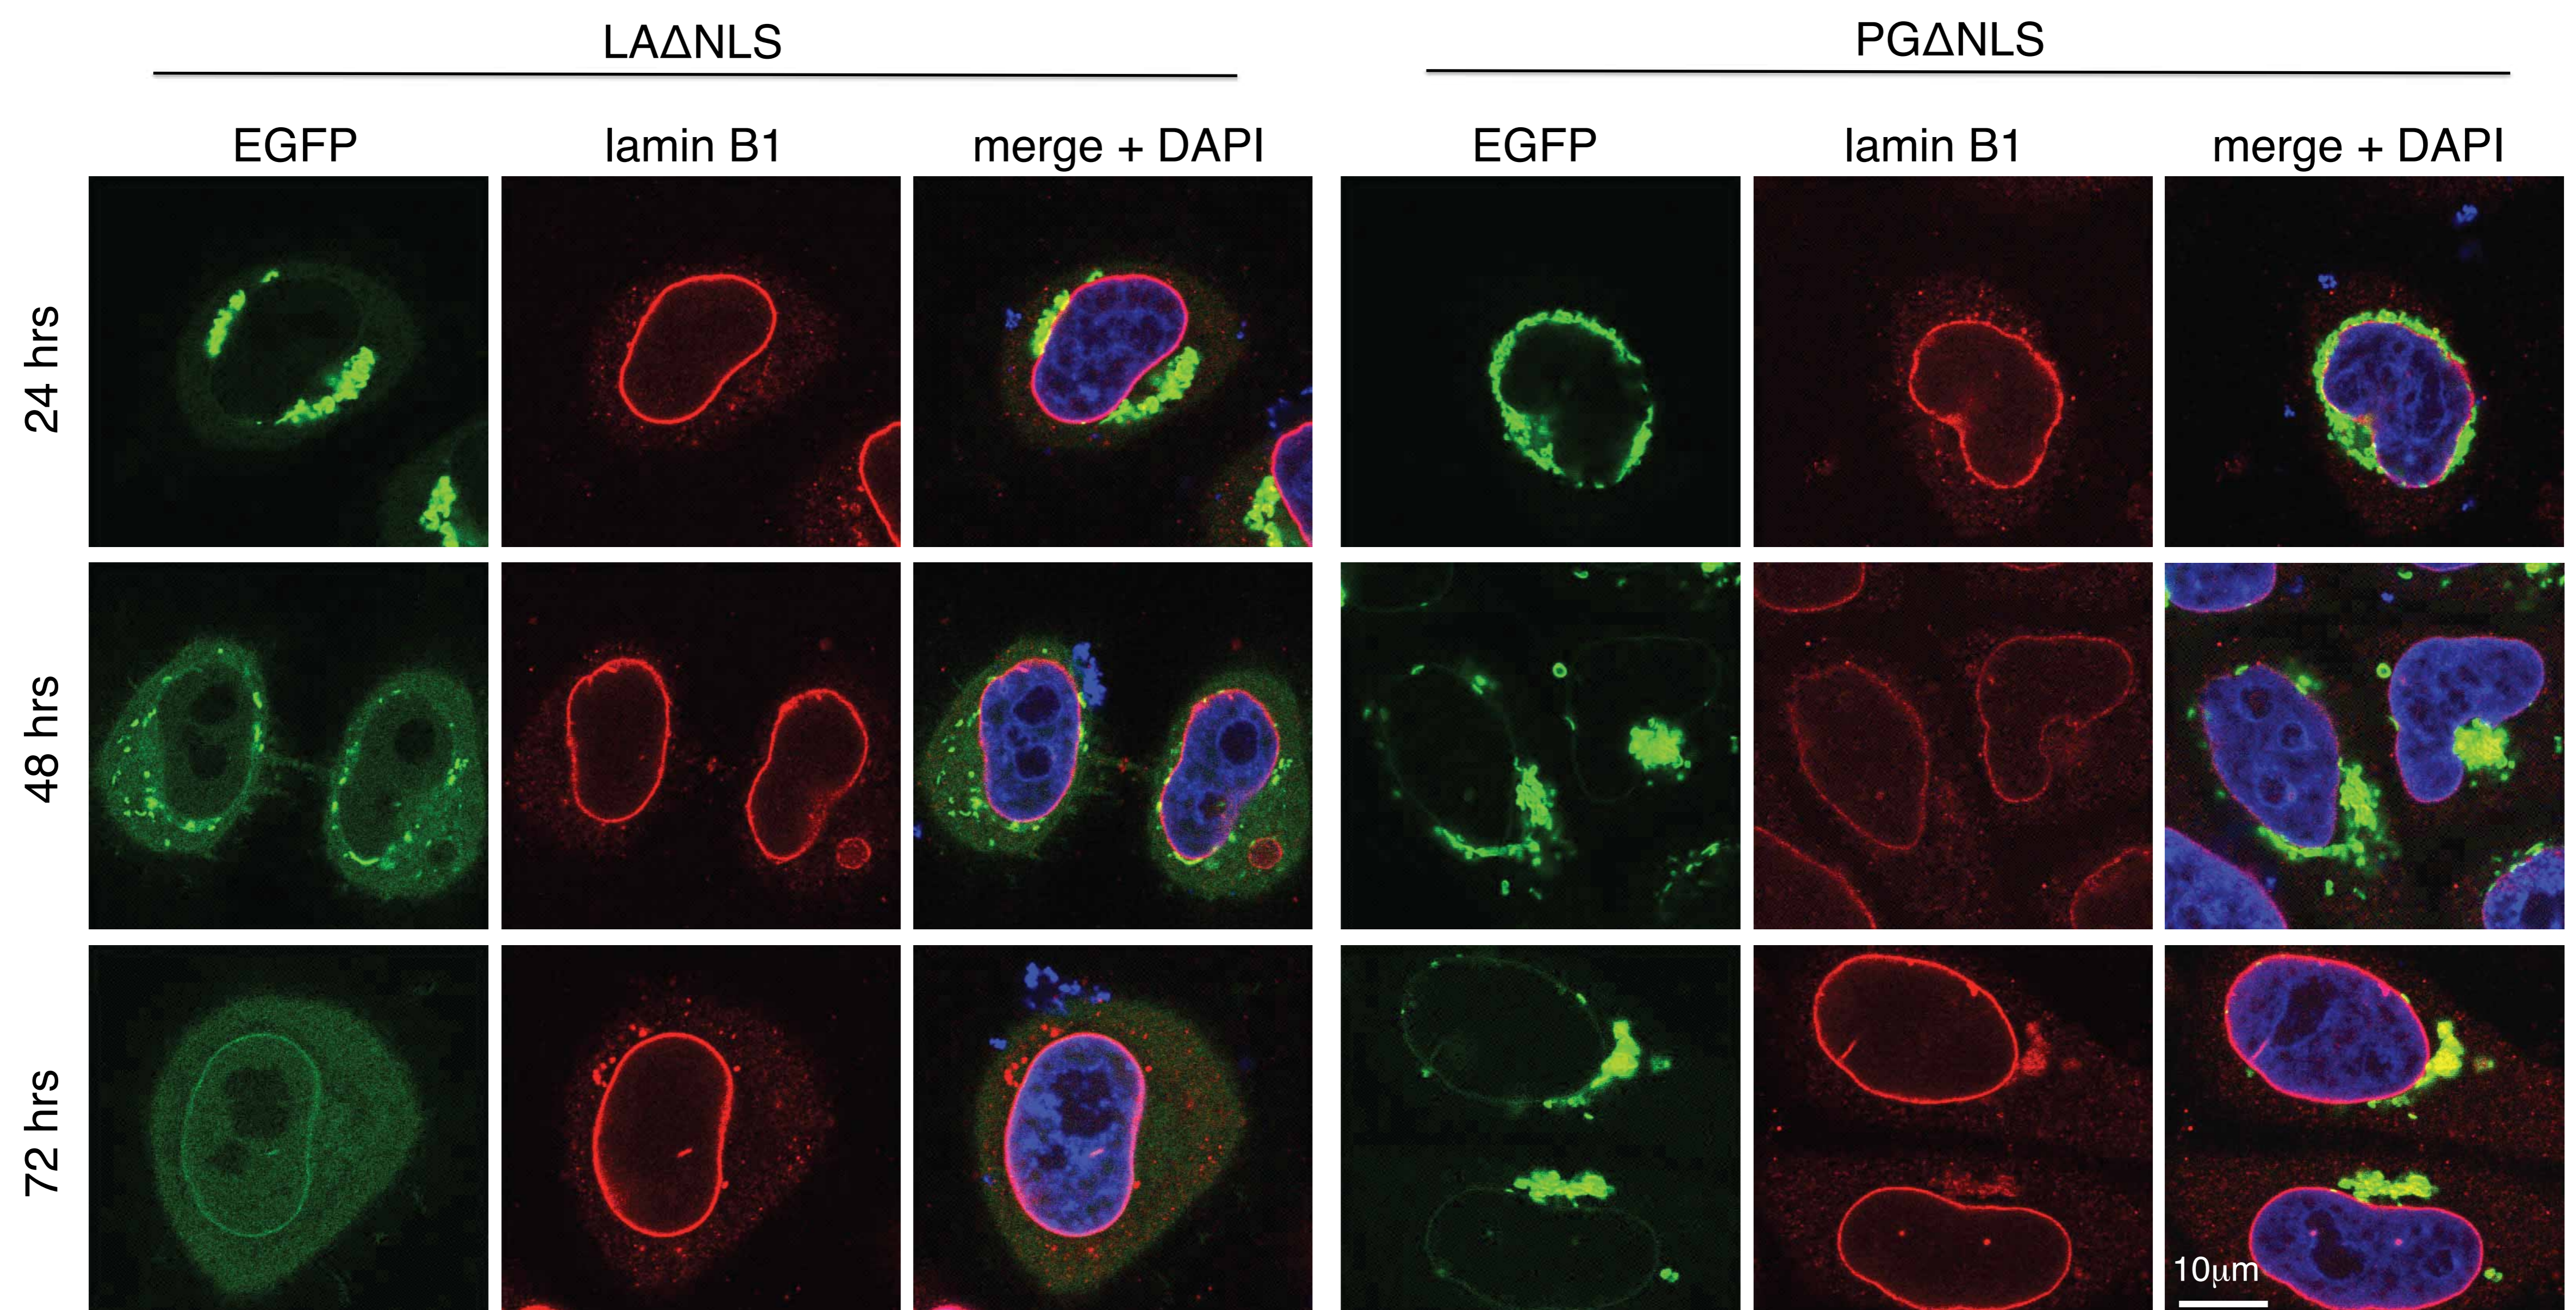

Fig S2: The time course experiment. The signals of EGFP-LA $\Delta$ NLS and EGFP-PG $\Delta$ NLS were fixed and photographed at 24, 48 and 72 hours post-transfection. We found that the aggregates of LA $\Delta$ NLS gradually solubilized with the passage of time. In contrast, the PG $\Delta$ NLS aggregates remained associated with the ER throughout the 72 hour experiment. Scale Bar: 10 $\mu$ m.

## Figure S3

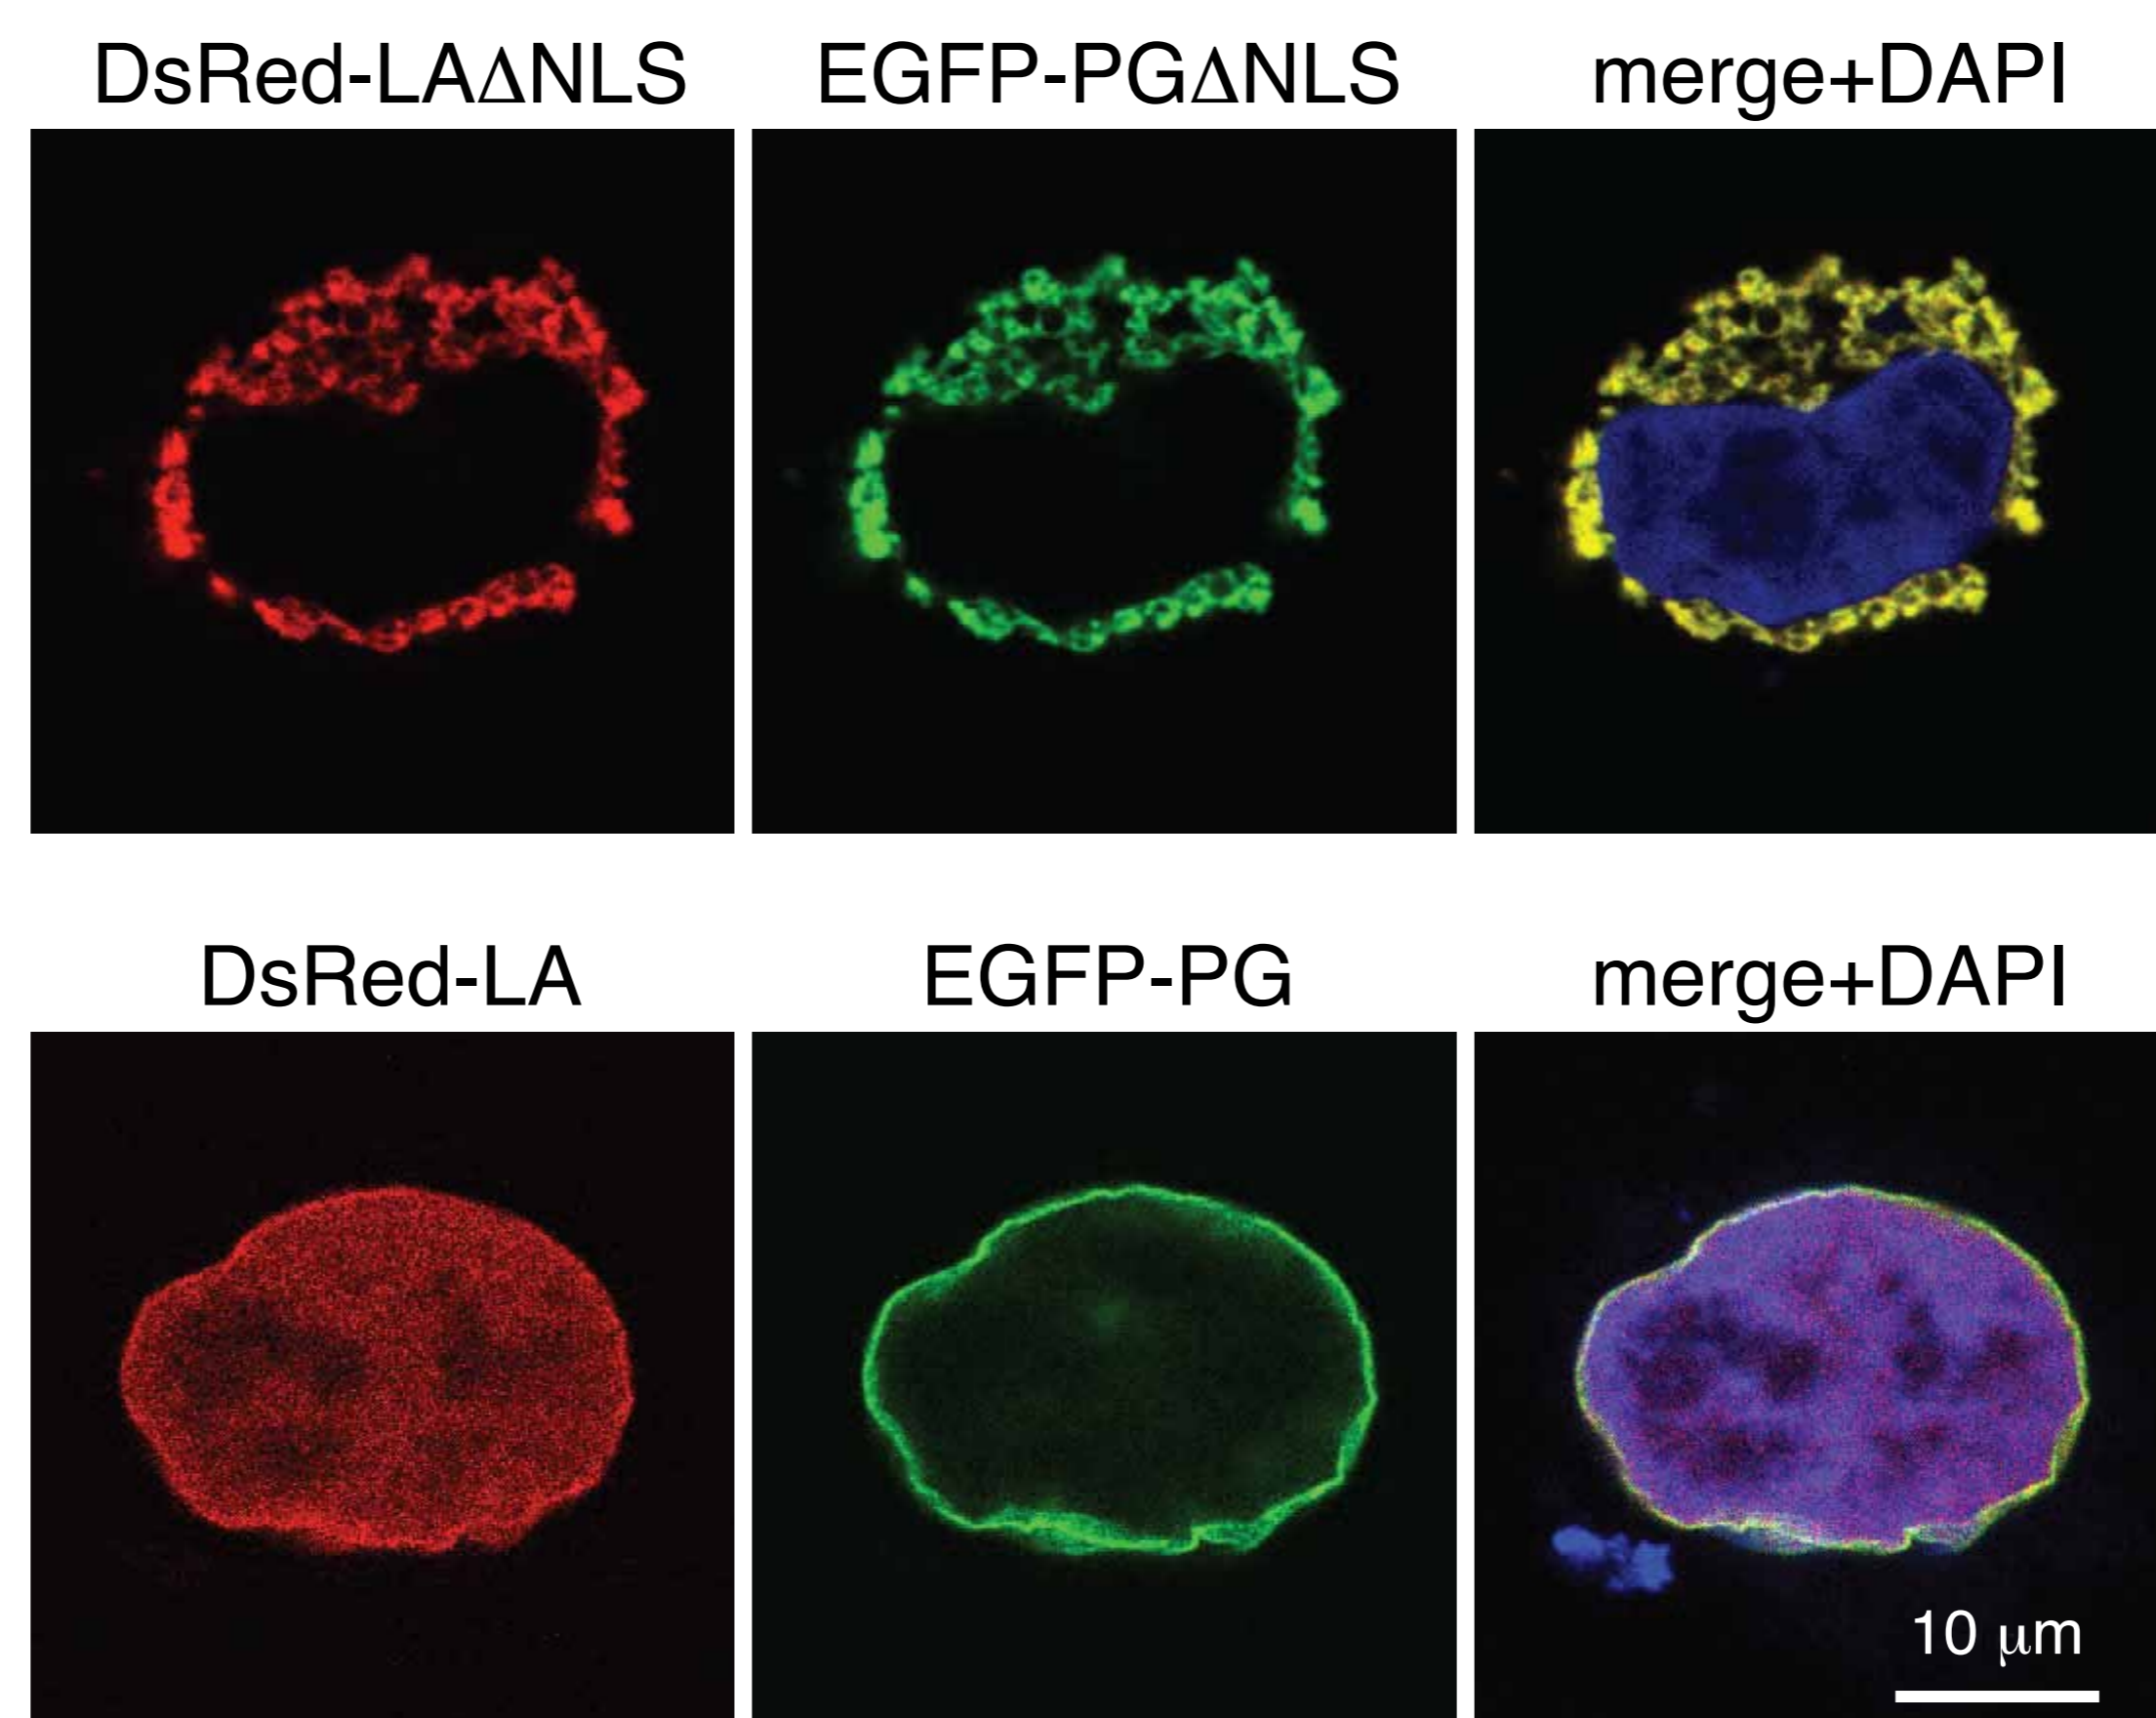

Fig S3: Confocal images show that LA $\Delta$ NLS and PG $\Delta$ NLS aggregates are co-localized in a sub-domain of the ER. HeLa cells were co-transfected with either LA $\Delta$ NLS and PG $\Delta$ NLS or lamin A and progerin. Lamin A and LA $\Delta$ NLS are in red and progerin and PG $\Delta$ NLS are in green. The distribution of DNA was detected with DAPI in blue. In merged images, yellow indicates overlapping between red and green. Scale bar: 10 $\mu$ m.

Figure S4

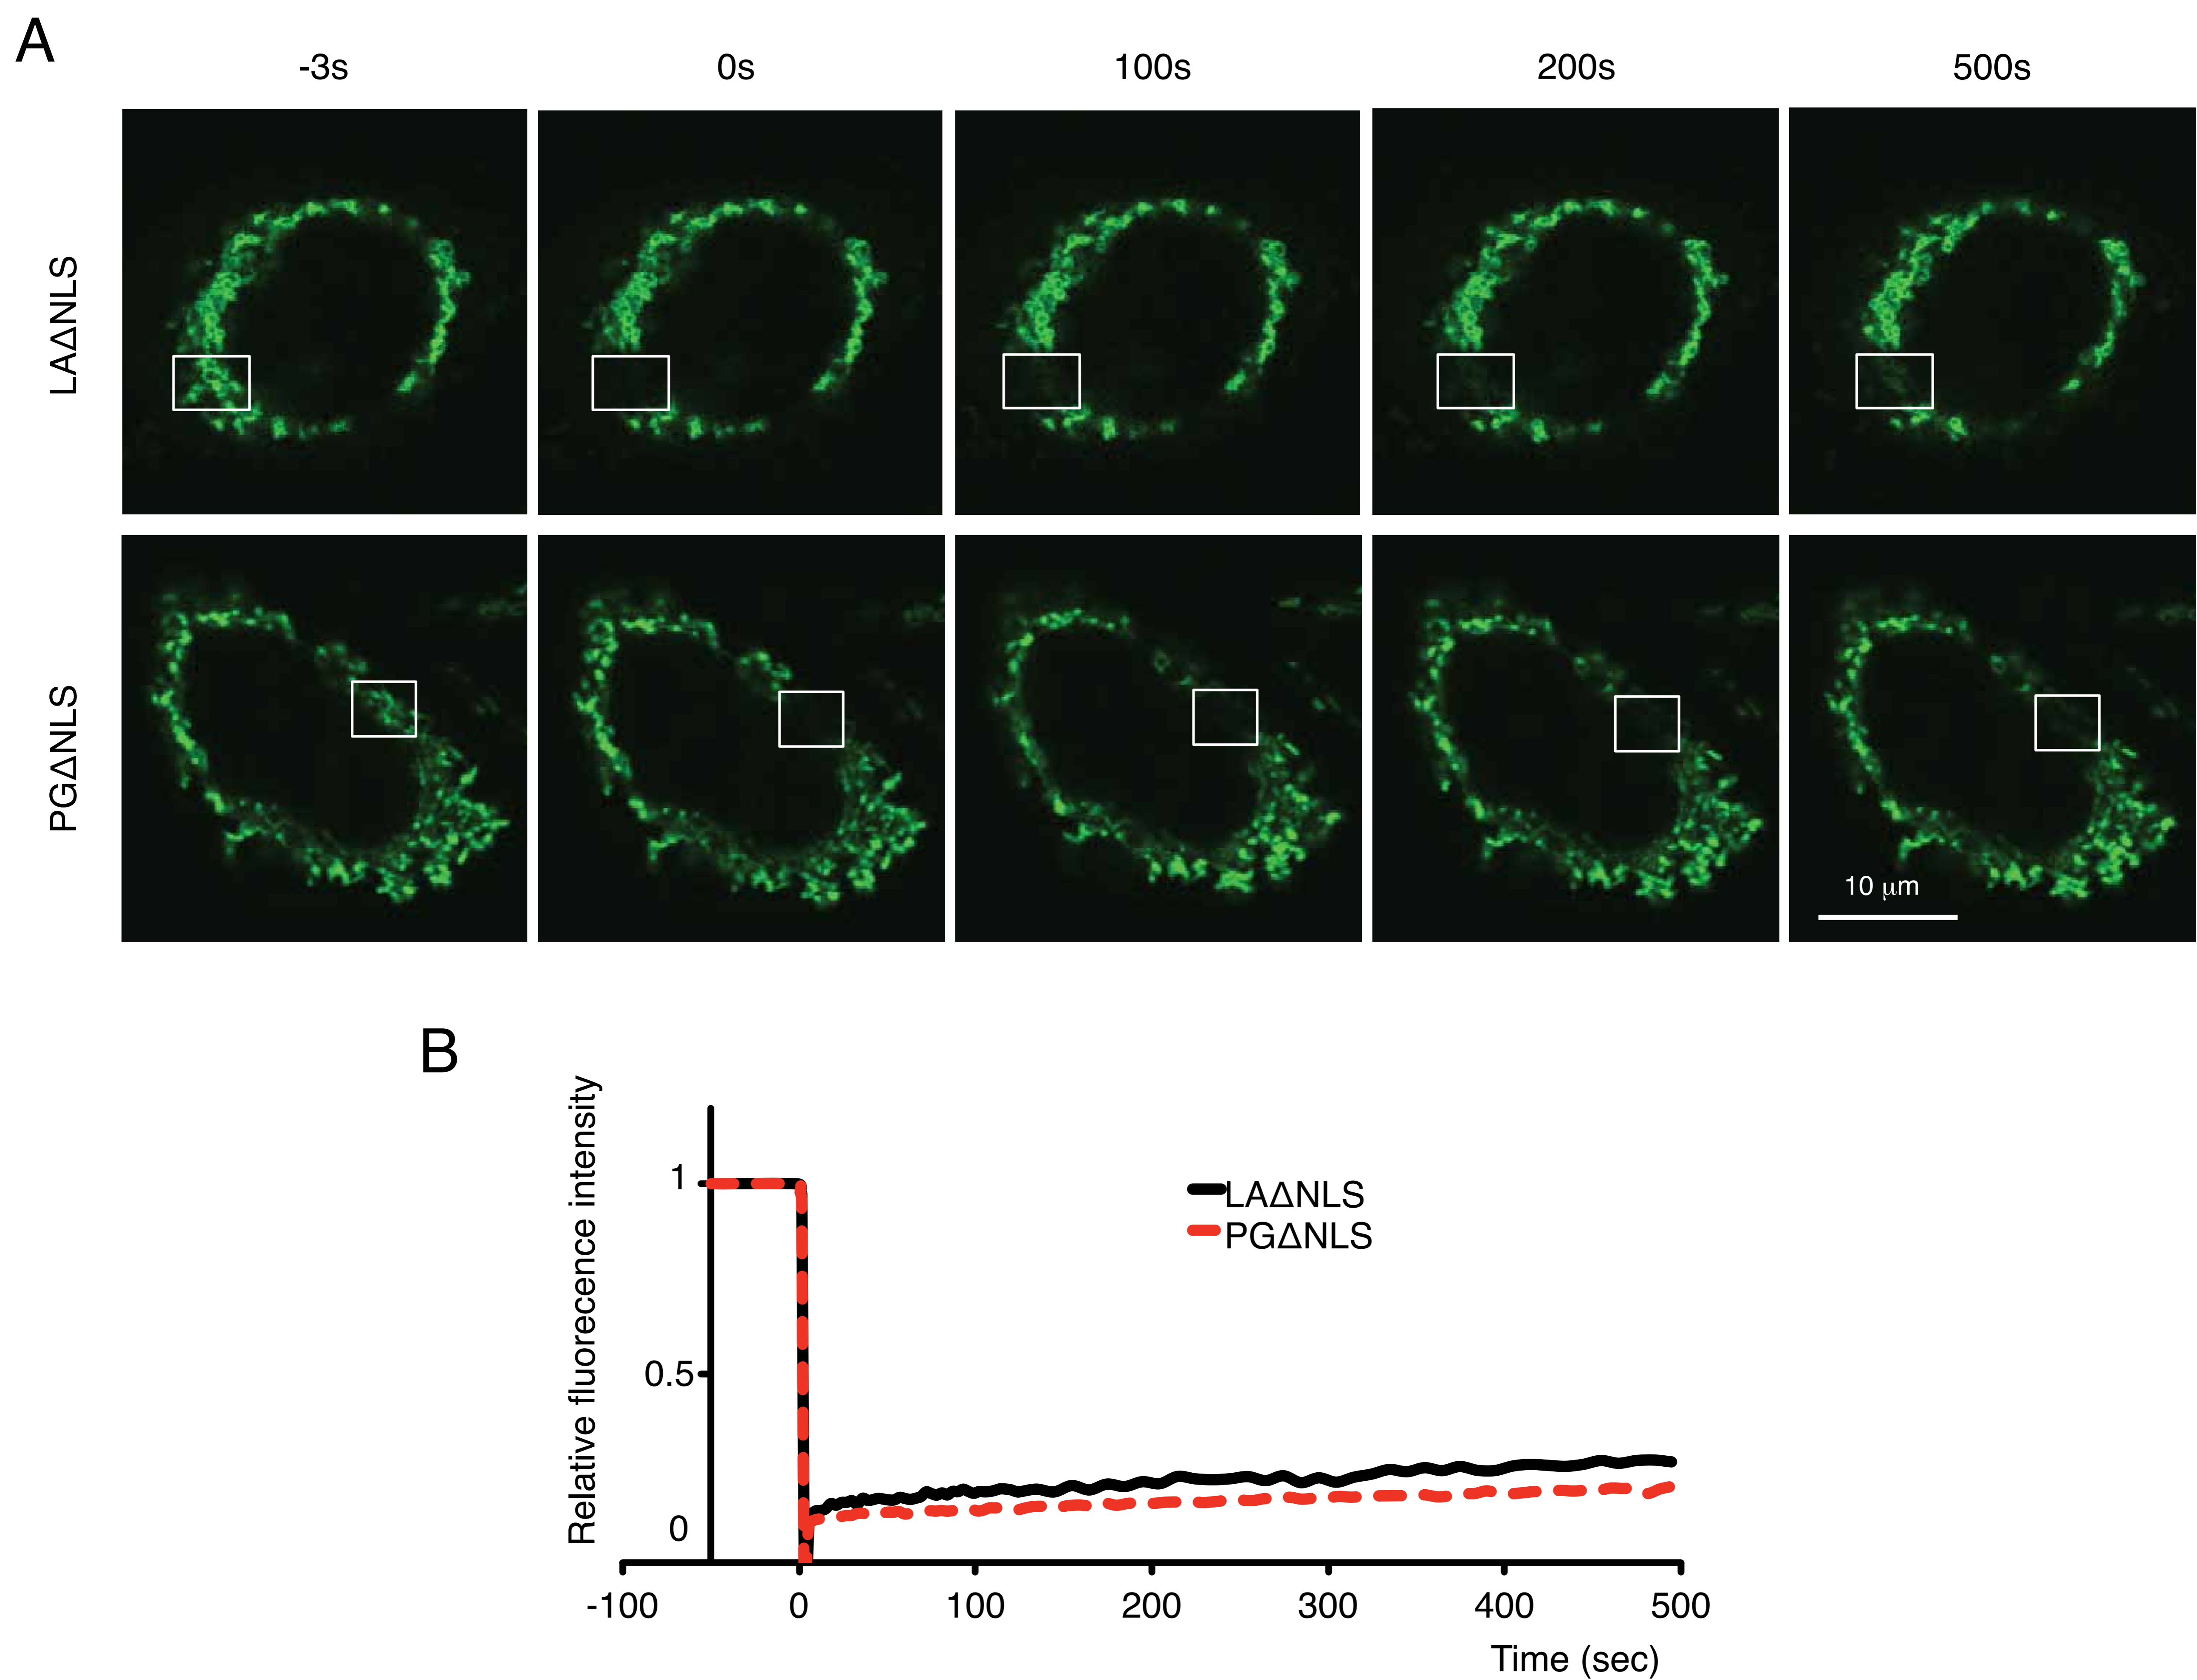

Fig S4: Fluorescence Recovery After Photo bleaching (FRAP) analysis of LA $\Delta$ NLS and PG $\Delta$ NLS aggregates. (A) Confocal images of the representative pictures at the denoted timepoints during the FRAP experiment. Squares indicate the photobleached areas. The  $\Delta$ NLS mutants are shown in green. Bars, 10 $\mu$ m. (B) Quantification of (A).
